# Supplementary material
Source: Springer Nature journal article supplement (https://www.springermedizin.de/resource/supplementary/12933_2011_416_MOESM1_ESM.pdf/9538128)
Supplement: MOESM1 [file 9538128]

475 citations identified and screened

Excluded:

- Adult (9)
- Unrelated topic (384)
- Duplicates (20)
- Review (24)
- No assessment of cardiometabolic risk factors (1)
- Language other than English (8)

29 papers retrieved for detailed information

Excluded:

- Population studies (10)
- Cohort too small ( $n < 100$ ) (3)

16 articles included

(10 contained information for both means and prevalence, 5 only for means, 1 only for prevalence)
